# Supplementary material for: The other pandemic: lessons from 40 years of HIV research
Source: PubMed Central journal article supplement (PMC11213503; doi:10.1172/jci183039), 2024-07-01
Supplement: jci-134-183039-s241.pdf [file jci-134-183039-s241.pdf]

List of Patent Applications or Issued Patents relating to HIV Vaccine Development

|                                                                   |                                          |
|-------------------------------------------------------------------|------------------------------------------|
| BISPECIFIC MOLECULES COMPRISING AN HIV-1 ENVELOPE TARGETING ARM   | US 10,717,778                            |
| BISPECIFIC MOLECULES COMPRISING AN HIV-1 ENVELOPE TARGETING ARM   | US 16/890,380                            |
| MOSIAC HIV ENVELOPE IMMUNOGENIC POLYPEPTIDES                      | US 9,855,329                             |
| HIV-1 NEUTRALIZING ANTIBODIES AND USES THEREOF                    | US 11,071,783                            |
| HIV-1 NEUTRALIZING ANTIBODIES AND USES THEREOF                    | US 11,944,681                            |
| HIV-1 NEUTRALIZING ANTIBODIES AND USES THEREOF (V3 ANTIBODIES)    | US 10,344,077                            |
| HIV-1 NEUTRALIZING ANTIBODIES AND USES THEREOF (CD4bs antibodies) | US 10,450,368                            |
| HIV ENVELOPES TO INDUCE CH235 LINEAGE ANTIBODIES                  | US 10,968,255                            |
| HIV ENVELOPES TO INDUCE CH235 LINEAGE ANTIBODIES                  | US 11,884,704                            |
| COMPOSITIONS AND METHODS FOR INDUCING HIV-1 ANTIBODIES            | US 11,246,920                            |
| COMPOSITIONS AND METHODS FOR INDUCING HIV-1 ANTIBODIES            | US 11,318,197                            |
| COMPOSITIONS COMPRISING MODIFIED HIV ENVELOPES                    | US 11,814,413                            |
| MOSAIC HIV-1 ENVELOPES TO INDUCE ADCC RESPONSES                   | US 11,773,144                            |
| A METHOD OF INHIBITING HIV INFECTION                              | US 6,432,405                             |
| HIV-1 ENVELOPE STABILIZING MUTATIONS                              | US 17/281,918 EP 19868740.2 CA 3,114,870 |
| HIV ENVELOPES TO INDUCE HIV-1 ANTIBODIES                          | US 17/281,933 EP 19868959.8 CA 3,115,232 |
| COMPOSITIONS COMPRISING V2 OPT HIV ENVELOPES                      | US 17/771,349 CA 3,234,955               |
| COMPOSITIONS COMPRISING V2 OPT HIV ENVELOPES                      | PCT/US2024/024154                        |
| COMPOSITIONS COMPRISING V2 OPT HIV ENVELOPES                      | US 18/700,679                            |
| HIV ENVELOPES TO INDUCE HIV-1 ANTIBODIES                          | US 18/032,497 EP 21883746.6 CA 3,196,100 |
| HIV-1 ENVELOPE GLYCOPEPTIDE NANOPARTICLES AND THEIR USES          | US 18/280,935 EP 22767805.9              |
| HIV-1 ENVELOPE GLYCOPEPTIDE NANOPARTICLES AND THEIR USES          | CA 3,211,186                             |
| COMPOSITIONS COMPRISING HIV ENVELOPES TO INDUCE HIV ANTIBODIES    | US 18/700,677                            |
| HIV VACCINE IMMUNOGENS FOR V3-GL YCAN TARGETING ANTIBODIES        | PCT/US2023/073257                        |
| STABILIZATION OF HUMAN IMMUNODEFICIENCY VIRUS (HIV) ENVELOPES     | PCT/US2023/077611                        |
| MODELING AND STABILIZING HIV ENVELOPES                            | PCT/US2024/016309                        |

COMPOSITIONS COMPRISING HIV-1 ENVELOPES WITH ENGINEERED V1V2 OR MRNAs ENCODING THE SAME FOR BROAD V3-GLYCAN NEUTRALIZING ANTIBODY BINDING PCT/US2023/077804

COMPOSITIONS COMPRISING HIV-1 ENVELOPES WITH ENGINEERED V1V2 OR MRNAs ENCODING THE SAME FOR BROAD V3-GLYCAN NEUTRALIZING ANTIBODY BINDING PCT/US2023/077808

COMPOSITIONS COMPRISING mRNAs ENCODING HIV-1 MEMBRANE PROXIMAL EXTERNAL REGION (MPER) PEPTIDES PCT/US2023/077677

COMPOSITIONS COMPRISING mRNAs ENCODING HIV-1 MEMBRANE PROXIMAL EXTERNAL REGION (MPER) PEPTIDES PCT/US2023/077686

HIV-1 FUSION PEPTIDE NANOPARTICLE VACCINES US 63/540,484

HIV-1 ENVELOPES FOR V3-GLYCAN NEUTRALIZING ANTIBODY BINDING US 63/634,216

HIV-1 ENV IMMUNOGENS THAT TARGET UCAS AGAINST MULTIPLE ANTIGENIC SITES US 63/634,195

A COMPUTATIONAL PROCESS FOR IDENTIFYING HIV-1 BROADLY NEUTRALIZING ANTIBODIES, THEIR PRECURSORS, AND INTERACTIVE IMMUNOGENS US 63/634,200

BOOSTING BnAbs AGAINST HIV-1 US 63/634,232
